# Supplementary material for: Recyclable heat-resisting polymer poly(ether azaindole ketone)-H+via hydrogen bonding crosslinking
Source: Royal Society of Chemistry journal article supplement (doi:10.1039/c7py02097j), 2018-01-01
Supplement: c7py02097j1.pdf [file c7py02097j1.pdf]

## *Supporting Information*

### **Recyclable Heat-resisting Polymer Poly(ether azaindole ketone)-H<sup>+</sup> via Hydrogen Bonding Crosslinking**

Q. Yin, Y. Peng, S. Zhang\*, F. Zhu, W. Li, K. Du

Research Center of Laser Fusion, China Academy of Engineering Physics, Mianyang,  
621900, Sichuan, China

E-mail: zhangshuai\_scu@126.com; Fax: +86 816-2493148

# Table of contents

|                                                                                |             |
|--------------------------------------------------------------------------------|-------------|
| <b>1. Materials and Reagents .....</b>                                         | <b>S2</b>   |
| <b>2. Measurements.....</b>                                                    | <b>S2</b>   |
| <b>3. Synthesis of Poly(ether azaindole ketone) (PEAINK) .....</b>             | <b>S3-5</b> |
| <b>4. Preparation of PEAINK film .....</b>                                     | <b>S5</b>   |
| <b>5. Preparation of PEAINKH<sup>+</sup> film.....</b>                         | <b>S5</b>   |
| <b>6. Solubility of the PEAINK and PEAINKH<sup>+</sup> films .....</b>         | <b>S6</b>   |
| <b>7. The powder wide-angle X-ray diffraction of PEAINKH<sup>+</sup> .....</b> | <b>S6</b>   |

## 1. Materials and Reagents

4-hydroxy-7-azaindole was purchased from TCI Development Co., Ltd. and used without further purification, 4,4'-difluorobenzophenone was purchased from J & K Technology Co., Ltd., and was purified by recrystallization from alcohol twice before use. The rest of materials and reagents were obtained from different commercial sources and used without further purification.

## 2. Measurements

FTIR spectra were recorded on a Nicolet 6700 FTIR spectrometer.  $^1\text{H}$  NMR were performed on Bruker AV-400 spectrometer at 400 MHz in  $\text{DMSO-}d_6$  ( $\delta$  2.50 ppm), while  $^{13}\text{C}$  NMR spectra were also recorded on a Bruker AV-400 spectrometer at 100 MHz in  $\text{DMSO-}d_6$  ( $\delta$  2.50 ppm). The molecular weights and molecular weight distributions were estimated by gel permeation chromatography (GPC) on a Wyatt DAWNHELEOS using  $N,N$ -dimethylformamide (DMF) (adding 1% LiBr) as an eluent, testing temperature 50 °C. The glass transition temperature was obtained by DSC curve at a rate of 10 °C/min under flowing nitrogen gas. The thermogravimetric analysis (TGA) was performed on a Setarma TG-92 at a heating rate of 10 °C/min under nitrogen atmosphere. Absorption spectra were detected on a SHIMADZU UV-3150 UV-vis-NIR spectrophotometer.

### 3. Synthesis of Poly(ether azaindole ketone) (PEAINK)

A three-necked flask (25 mL) with a magnetic stirrer was evacuated and backfilled with nitrogen. Then the flask was charged with 4-hydroxy-7-azaindole 0.4024 g (3.0 mmol), 4,4'-difluorobenzophenone 0.6546 g (3.0 mmol),  $K_2CO_3$  0.8292 g (6 mmol), and NMP (10.0 mL). The reaction mixture was evacuated and flushed with nitrogen and repeated this procedure for three times. The flask was immersed with continuous stirring in a 190 °C oil bath for 5 h. The resulting solution was allowed to slowly cool to room temperature and subsequently poured into cold water, filtered, washed with anhydrous ethanol, and then dried at 65 °C under vacuum for 24 h.

Yield: 93%; FTIR spectrum (KBr pellet),  $cm^{-1}$ : 3137, 1663, 1618, 1435, 1377, 1121, 1051, 876;  $^1H$  NMR (600 MHz,  $DMSO-d_6$ ),  $\delta$  H, ppm: 6.47-6.89 (m, 2H), 7.16-7.31 (m, 2H), 7.38-7.61 (m, 3H), 7.79-8.36 (m, 5H); Anal. calcd. for  $C_{20}H_{12}N_2O_2$ , %: C, 76.92 ; H, 3.85; N, 8.97; Found, %: C, 76.87; H, 3.86; N, 8.89.

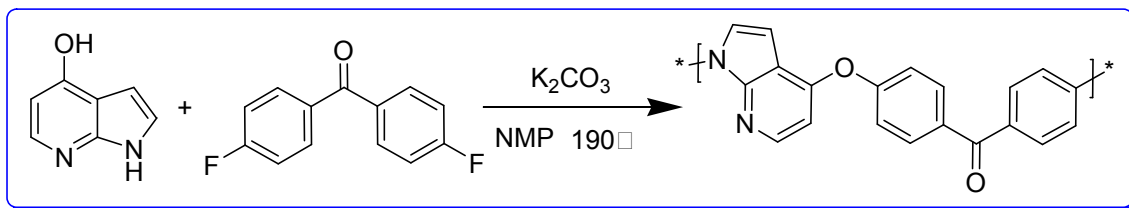

**Scheme 1.** Synthesis of PEAINK.

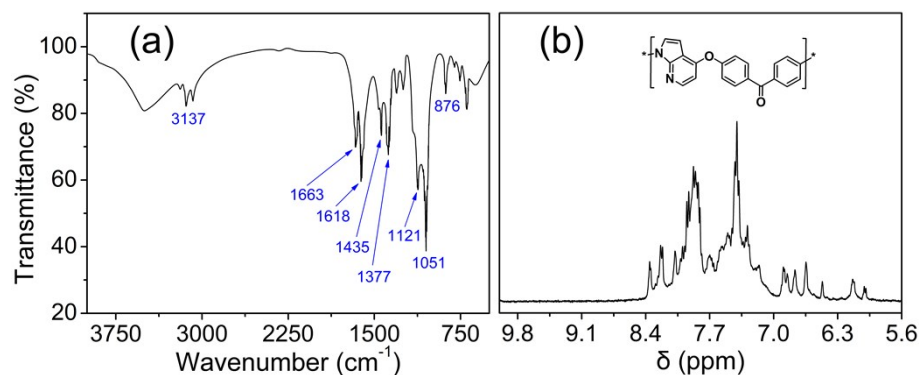

**Fig. S1.** FT-IR and <sup>1</sup>H NMR spectra of PEAINK.

#### 4. Preparation of PEAINK film

0.0625 g polymer PEAINK was dissolved in 2.5 mL NMP to form a 2.5 wt % solution, the polymer solution was filtered and subsequently cast onto a clean glass sheet, and dried in a convection oven at 70 °C for 24 h and then further dried under vacuum at 70 °C for another 24 h to afford the PEAINK polymer film (about 14 μm thickness).

#### 5. Preparation of PEAINKH<sup>+</sup> film

0.0625 g polymer PEAINK was dissolved in 2.5 mL NMP to form a 2.5 wt % solution, the polymer solution was filtered, and the desired mole equivalent of the HCl ( $n_{(H^+)}:n_{(azaindole)}=1:1$ ) was added into the PEAINK polymer solution, the solution was subsequently cast onto a clean glass sheet, and dried in a convection oven at 70 °C for 24 h and then further dried under vacuum at 70 °C for another 24 h to afford the PEAINKH<sup>+</sup> polymer film (about 15 μm thickness).

## 6. Solubility of the PEAINK and PEAINKH<sup>+</sup> films

Table S1. Solubility of PEAINK and PEAINKH<sup>+</sup> films

| Sample                    | DMAc            | DMSO | DMF | NMP | THF             |
|---------------------------|-----------------|------|-----|-----|-----------------|
| PEAINK film               | ++ <sup>a</sup> | ++   | ++  | ++  | -- <sup>b</sup> |
| PEAINKH <sup>+</sup> film | --              | --   | --  | --  | --              |

<sup>a</sup> ++: The polymer can be completely dissolved at room temperature; <sup>b</sup> --: the polymer was insoluble at both room temperature and 50 °C.

## 7. The powder wide-angle X-ray diffraction of PEAINKH<sup>+</sup>

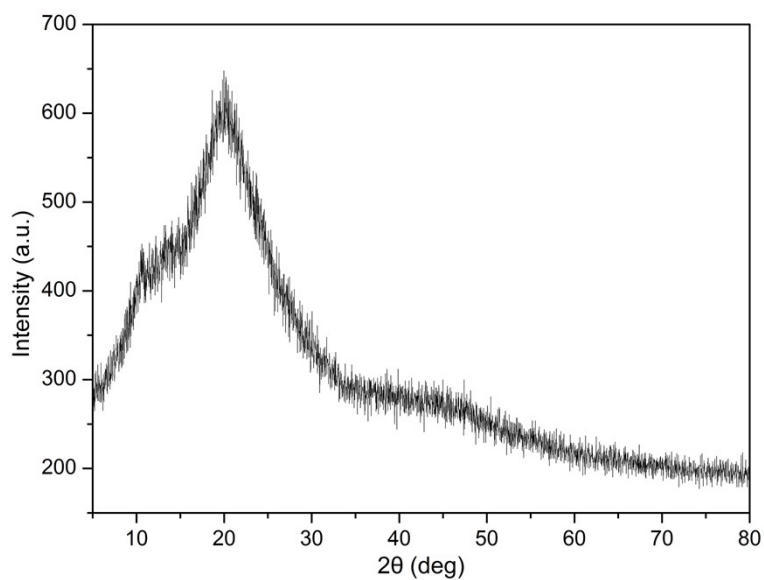

Fig. S2. The powder wide-angle X-ray diffraction of PEAINKH<sup>+</sup> polymer.
